# Supplementary material for: Genetic Basis of Metabolome Variation in Yeast
Source: PubMed Central journal article supplement (PMC3945093; doi:10.1371/journal.pgen.1004142), 2014-03-06
Supplement: pgen.1004142.s006.pdf [file pgen.1004142.s006.pdf]

| Name                             | PubChem ID   | LOD score | Chromosome | Position (cM) | Parent's P-value |
|----------------------------------|--------------|-----------|------------|---------------|------------------|
| aconitate                        | 643757       | 6.032     | 12         | 315.18        | 0.149694583      |
| ADP                              | 6022         | 3.650     | 2          | 227.24        | 0.0000781        |
| allantoate                       | 5287444      | 3.838     | 15         | 334.51        | N/A              |
| aspartate                        | 5960         | 4.681     | 2          | 227.24        | 0.00000024       |
| aspartate                        | 5960         | 4.633     | 16         | 268.52        | 0.00000024       |
| ATP                              | 5957         | 3.512     | 16         | 292.16        | 0.00000024       |
| citrate/isocitrate               | 311/5459771  | 5.077     | 13         | 0.00          | 0.106793758      |
| citrate/isocitrate               | 311/5459771  | 4.555     | 15         | 43.86         | 0.106793758      |
| dihydroorotate                   | 5460289      | 18.581    | 3          | 60.08         | 1.46E-11         |
| dihydroorotate                   | 5460289      | 4.376     | 2          | 238.07        | 1.46E-11         |
| dihydroxy-acetone phosphate      | 4643300      | 5.449     | 15         | 48.32         | 0.0000518        |
| Sedoheptulose 7-phosphate        | 165007       | 4.473     | 2          | 203.32        | 2.93E-13         |
| Sedoheptulose 7-phosphate        | 165007       | 3.922     | 16         | 170.08        | 2.93E-13         |
| Sedoheptulose 7-phosphate        | 165007       | 3.274     | 15         | 45.65         | 2.93E-13         |
| Sedoheptulose 7-phosphate        | 165007       | 3.243     | 13         | 40.33         | 2.93E-13         |
| fructose-1,6-bisphosphate        | 5460765      | 5.104     | 15         | 48.32         | 0.0000207        |
| glutamate                        | 5460544      | 3.680     | 16         | 268.52        | 0.00000317       |
| glutamate                        | 5460544      | 3.356     | 2          | 220.12        | 0.00000317       |
| glutathione†                     | 124886       | 3.705     | 9          | 109.64        | 2.57E-09         |
| glutathione disulfide†           | 975          | 3.545     | 2          | 228.12        | N/A              |
| hexose-phosphate                 | 466/4459709  | 5.151     | 2          | 227.24        | 9.08E-11         |
| hexose-phosphate                 | 466/4459709  | 4.150     | 16         | 170.08        | 9.08E-11         |
| hexose-phosphate                 | 466/4459709  | 3.622     | 15         | 47.44         | 9.08E-11         |
| hexose-phosphate                 | 466/4459709  | 4.410     | 13         | 14.31         | N/A              |
| inosine                          | 6021         | 3.825     | 14         | 113.37        | 2.44E-13         |
| lactate                          | 5460161      | 6.858     | 12         | 313.39        | N/A              |
| Lysine (possibly glutamine)      | 5962         | 3.518     | 15         | 5.25          | N/A              |
| N-acetyl-glucosamine-1-phosphate | 25243937     | 5.662     | 2          | 214.65        | 1.43E-08         |
| NAD+ _posi                       | 5892         | 4.114     | 2          | 219.24        | 0.0000846        |
| NADP+ _posi                      | 15938972     | 3.672     | 5          | 132.89        | 0.0000846        |
| orotate                          | 967          | 18.649    | 5          | 78.88         | 3.43E-18         |
| orotidine                        | 160617       | 19.150    | 5          | 78.89         | 5.39E-18         |
| orotidine-5'-phosphate           | 160617       | 18.740    | 5          | 78.89         | 9.25E-15         |
| phenylpyruvate                   | 997          | 3.629     | 2          | 207.77        | 1.49E-10         |
| quinolinate                      | 1066         | 4.348     | 13         | 201.64        | 2.12E-10         |
| quinolinate                      | 1066         | 3.448     | 15         | 279.00        | 2.12E-10         |
| ribose-phosphate                 | 77982/439236 | 3.677     | 12         | 171.77        | 1.02E-09         |
| ribose-phosphate                 | 77982/439236 | 3.608     | 2          | 206.89        | 1.02E-09         |
| ribose-phosphate                 | 77982/439236 | 3.423     | 16         | 259.79        | 1.02E-09         |
| S-adenosyl homocysteine*         | 439155       | 3.701     | 8          | 98.70         | 3.70E-13         |
| S-adenosyl homocysteine*         | 439155       | 5.414     | 8          | 92.85         | 1.63E-09         |
| S-adenosyl-L-methionine          | 34755        | 7.064     | 8          | 101.89        | 0.00000021       |
| serine                           | 5951         | 3.504     | 16         | 206.14        | 4.16E-08         |
| thiamine                         | 1130         | 9.873     | 8          | 100.12        | 1.08E-10         |
| threonine                        | 6288         | 4.365     | 2          | 244.45        | 0.000000433      |
| threonine                        | 6288         | 3.586     | 5          | 36.32         | 0.000000433      |
| UDP-D-glucose                    | 8629         | 6.179     | 5          | 78.89         | 3.39E-10         |
| UDP-D-glucose                    | 8629         | 3.768     | 2          | 244.45        | 3.39E-10         |
| UDP-N-acetyl-glucosamine         | 643981       | 5.685     | 2          | 219.24        | 0.0000113        |
| UDP-N-acetyl-glucosamine         | 643981       | 3.665     | 5          | 78.89         | 0.0000113        |
| valine                           | 6287         | 11.957    | 3          | 60.07         | 6.65E-09         |
| valine                           | 6287         | 3.623     | 16         | 166.53        | 6.65E-09         |
| valine                           | 6287         | 3.246     | 12         | 231.79        | 6.65E-09         |

Sup. Table 1. Metabolites and their linkage LOD-scores. All 52 linkages are listed, sorted by metabolite name. Metabolites with multiple linkages are sorted by LOD-score. The chromosome and position of the closest marker are also given. For metabolites detected in both parental strains, the p-value of metabolite level differences between the parents is also shown. FDR of 5% corresponds to a p-value of 0.0898. \* Same compound but in different ionization modes. † considered same compound
