# Supplementary material for: Genetic Basis of Metabolome Variation in Yeast
Source: PubMed Central journal article supplement (PMC3945093; doi:10.1371/journal.pgen.1004142), 2014-03-06
Supplement: pgen.1004142.s007.pdf [file pgen.1004142.s007.pdf]

| Compound                          | # Overlapping Pathway Genes | Overlapping Pathway Genes                         | # Metabolic Genes in CI(s)                                      |
|-----------------------------------|-----------------------------|---------------------------------------------------|-----------------------------------------------------------------|
| aconitate                         | 1                           | ACO1                                              | 16                                                              |
| ADP                               | 8                           | PYC2, PGI1, ADH5, YPC1, MIS1, RIB7, ECM31, DUR1,2 | 38                                                              |
| allantoate                        | 0                           |                                                   | 20                                                              |
| aspartate                         | 1                           | II: PYC2                                          | 17 on Chr II 1<br>on Chr XVI                                    |
| ATP-nega                          | 6                           | MET16, ERG10, GLN1, MET12, ASN1, CIT3             | 27                                                              |
| citrate/isocitrate                | 0                           |                                                   | 1 on Chr XIII 4<br>on Chr XV                                    |
| dihydroorotate                    | 0                           |                                                   | 25 on Chr II 1<br>on Chr III                                    |
| dihydroxy-acetone phosphate       | 0*                          | *ADH1                                             | 1                                                               |
| Sedoheptulose 7-phosphate         | 3                           | II: TKL2; XV: RKI1; XVI: TKL1                     | 27 on Chr II 67<br>on Chr XIII 72<br>on Chr XV 17<br>on Chr XVI |
| fructose-1,6-bisphosphate         | 0*                          | *ADH1                                             | 1                                                               |
| glutamate                         | 6                           | II: TYR1, LYS2, PYC2, ADH5; XVI: ARO7, GLN1       | 25 on Chr II 23<br>on Chr XVI                                   |
| glutathione/glutathione-disulfide | 1                           | II: GPX2                                          | 67 on Chr II 3<br>on Chr IX                                     |
| hexose-phosphate                  | 3                           | II: PYC2; XV: RKI1; XVI: TKL1                     | 18 on Chr II 5<br>on Chr XIII 65<br>on Chr XV 17<br>on Chr XVI  |
| inosine                           | 2                           | ADE12, AAH1                                       | 14                                                              |
| lactate                           | 0                           |                                                   | 2                                                               |
| lysine                            | 6                           | CPA1, ADE2, CDC21, DFR1, HIS3, NPT1               | 72                                                              |
| N-acetyl-glucosamine-1-phosphate  | 0                           |                                                   | 16                                                              |
| NAD+                              | 6                           | II: ADH5, PGI1, PYC2, MET8, PDB1, ARA1            | 21 on Chr II                                                    |
| NADP+                             | 6                           | ALD5, CEM1, PRO3, ILV1, HOM3, ARG5,6              | 40                                                              |
| orotate                           | 1                           | URA3                                              | 1                                                               |
| orotidi                           | 1                           | URA3                                              | 1                                                               |
| orotidine-5'-phosphate            | 1                           | URA3                                              | 1                                                               |
| phenylpyruvate                    | 1                           | II: ADH5                                          | 67 on Chr II                                                    |
| quinolinate                       | 0                           |                                                   | 9 on Chr XIII<br>38 on Chr XV                                   |
| ribose-phosphate                  | 6                           | XII: ADE13, IMD3, PNP1, TAL1, URA4; XVI: TKL1     | 21 on Chr II 61<br>on Chr XII 58<br>on Chr XVI                  |
| S-adenosyl homocysteine           | 1                           | ERG7                                              | 22                                                              |
| S-adenosyl-L-methionine           | 0                           |                                                   | 4                                                               |
| serine                            | 1                           | MET12                                             | 23                                                              |
| thiamine                          | 0                           |                                                   | 2                                                               |
| threonine                         | 3                           | V: GLY1, ILV1, UTR4                               | 17 on Chr II 48<br>on Chr V                                     |
| UDP-D-glucose                     | 0                           |                                                   | 17 on Chr II 3<br>on Chr V                                      |
| UDP-N-acetyl-glucosamine          | 1                           | V: PCM1                                           | 12 on Chr II 37<br>on Chr V                                     |
| valine                            | 5                           | III: ILV6; XII: ECM38, MEU1, PDC1, PDC5           | 2 on Chr III 60<br>on Chr XII 46<br>on Chr XVI                  |

Sup. Table 2. Examining Confidence Intervals for Pathway Genes.
